# Supplementary material for: Simultaneous analysis of coumarin derivatives in extracts of Radix Angelicae pubescentis (Duhuo) by HPLC-DAD-ESI-MSn technique
Source: Royal Society of Chemistry journal article supplement (doi:10.1039/c4ay01468e), 2014-01-01
Supplement: c4ay01468e1.pdf [file c4ay01468e1.pdf]

*Supporting Information for*

## **Simultaneous analysis of coumarin derivatives in extracts of Radix angelicae pubescentis (Duhuo) by HPLC-DAD-ESI- MS<sup>n</sup> technique**

Bin Wang\*, Xianhua Liu, An Zhou, Mei Meng, Qinglin Li\*

Key Laboratory of Xin'an Medicine, Ministry of Education, Anhui Province Key

Laboratory of R&D of Traditional Chinese Medicine, Anhui University of Traditional  
Chinese Medicine, Hefei, Anhui 230038 (P. R. China)

E-mail: wangbin5654@163.com, qinglin\_lee@hotmail.com

### **Table of contents**

|                                           | page  |
|-------------------------------------------|-------|
| Materials and instruments                 | S2    |
| Standard solutions and sample preparation | S2    |
| HPLC-DAD conditions                       | S2    |
| HPLC-ESI-MS <sup>n</sup> Conditions       | S2-S3 |
| Table S1                                  | S3    |
| Figure S1                                 | S3    |
| Figure S2                                 | S4    |
| Table S2                                  | S5-S6 |
| Scheme S1                                 | S7    |
| Figure S3                                 | S7    |
| Scheme S2                                 | S8    |
| Scheme S3                                 | S8    |
| Scheme S4                                 | S9    |
| Figure S4                                 | S9    |
| Figure S5                                 | S10   |
| Figure S6                                 | S11   |
| Figure S7                                 | S12   |
| Figure S8                                 | S13   |
| Figure S9                                 | S14   |
| Figure S10                                | S15   |
| Scheme S5                                 | S16   |

**Materials and instruments:** Psoralen(**3**), osthole(**21**) and isoimperatorin(**23**) (purity>98%) were purchased from the National Institute for the Control of Pharmaceutical and Biological Products (Beijing, China). Umbelliferone(**1**), xanthotoxin(**5**), bergapten(**12**) and columbianadin(**22**) (purity>98%) obtained from Tianjin Shilan Technology Co., Ltd (Tianjin, China).

HPLC grade methanol was procured from Merck (Darmstadt, Germany). Formic acid (analytical grade) was purchased from Shanghai Chemical Reagent Company (Shanghai, China). Water for HPLC analysis was purified by a Milli Q water purification system (Millipore Corporation, MA, USA). The analytical grade methanol, acetonitrile, petroleum ether and chloroform used for extraction was from Tianjin Reagent Company (Tianjin, China). PTFE membrane filter (0.45  $\mu$ m) was purchased from Waters Co. (Milford, MA). The samples was weighed in electronic balance (BP211D, Sartorius, Germany).

Duhuo (Dried roots of *Angelica pubescens* Maxim. f. *biserrata* Shan et Yuan) was purchased from Hubei province of China and was authenticated by Professor Mei Meng. The voucher specimen (DH-13-1002) was deposited at Key Laboratory of Chinese Medicine Research and Development in Anhui Province.

**Standard solutions and sample preparation:** Duhuo was ground into powder, passed through a 60 mesh sieve and dried at 50 °C for 6 h. An aliquot of 0.5 g of the dried sample was ultrasonically extracted using 10 ml of chloroform-methanol (1:1, v/v) for 30 min. The extractive of Duhuo was filtered and hence the sample solution was obtained. A stock solution containing seven standards (umbelliferone (**1**), psoralen (**3**), xanthotoxin (**5**), bergapten (**12**), osthole (**21**), columbianadin (**22**) and isoimperatorin (**23**)) was prepared in methanol and diluted with methanol to an appropriate concentration. All solutions were stored in the refrigerator at 4 °C and were filtered through a 0.45  $\mu$ m syringe filter before use.

**HPLC-DAD conditions:** The HPLC system (Finnigan-Thermo Fisher Electron Corporation, San Jose, CA, USA) was equipped with a quaternary pump (Model Finnigan Surveyor Plus), an autosampler (Model Finnigan Surveyor Plus with 200- $\mu$ l capacity sample) including a column oven controller, which was connected in a photo diode array detector (DAD) (Finnigan Surveyor Plus) quantitative analyzing and UV spectra acquisition. The chromatographic separation was performed on a C<sub>18</sub>ultimate XB-C<sub>18</sub> column (5  $\mu$ m,  $\phi$  4.6 mm  $\times$  250 mm, Welch, USA). The mobile phase was methanol (A) and water with 0.1% formic acid (B). A gradient program was as follows: 0-5 min, 35% A; 6-20 min, 49% A; 25-35 min, 65% A; 40-50 min, 90% A. The beginning gradient was held for 10 min. The flow rate was 1.0 mL/min. The injection volume was 10  $\mu$ L and the column temperature was maintained at 25 °C. The UV spectra was recorded from 200 nm to 400 nm. The detection wavelength was set at 246 nm, 274 nm and 320 nm. The chromatographic data were recorded and processed with an Xcalibur 2.0 chemstation workstation (Finnigan, San Jose, USA).

**HPLC-ESI-MS<sup>n</sup> Conditions:** Identification of Duhuo extracts was confirmed by HPLC online coupled with the electrospray ionization (ESI) source of an ion trap mass spectrometer (MS)(Finnigan LCQ Advantage, San Jose, CA, USA). The chromatographic conditions were the same as HPLC-DAD analysis described above, by solvent splitting, 0.3 mL/min portion of the column effluent was delivered into the ion source of mass spectrometry. A ion-trap mass spectrometer equipped with a electrospray ionization source and Xcalibur software version 2.0 was used for data acquisition and processing. Optimal operating parameters of the ESI interface and quadropole/ion trap were found by infusing seven standard solutions above, the mobile phase at 300  $\mu$ L/min using a Finnigan syringe pump. Ultrahigh pure helium (He) was used as the collision gas and high purity nitrogen (N<sub>2</sub>) as the nebulizing gas. The optimum conditions of the interface were applied as follows: capillary temperature of 300 °C; sheath gas pressure and auxiliary gas pressure of 35 arb and 10 arb; spray, capillary, and tube lens voltages of 4.5 kV, 14V and 45V. For full scan

MS analysis, the total analysis time was 50 min. The mass spectrometer was operated with a scan range of  $m/z$  150 to  $m/z$  800 in the positive ion mode.  $MS^2$  and  $MS^n$  ( $n=3-4$ ) analyses were performed by the collision of the precursor ions with helium gas. The energy values of collision-induce dissociation (CID) were automatically selected.

**Table S1.** The extraction result of Duhuo samples with different solvents for 30 min

| Extraction solvent                 | Ratio of Duhuo extract to sample<br>( $\text{mg}\cdot\text{g}^{-1}$ ) | Peak area of osthole<br>(%) |
|------------------------------------|-----------------------------------------------------------------------|-----------------------------|
| Petroleum ether                    | 53.112                                                                | 5.865                       |
| Chloroform                         | 103.564                                                               | 11.356                      |
| Methanol                           | 129.689                                                               | 12.587                      |
| Acetonitrile                       | 117.856                                                               | 9.467                       |
| Chloroform-methanol (1:1, v/v)     | 152.367                                                               | 16.356                      |
| Chloroform-acetonitrile (1:1, v/v) | 138.679                                                               | 12.956                      |

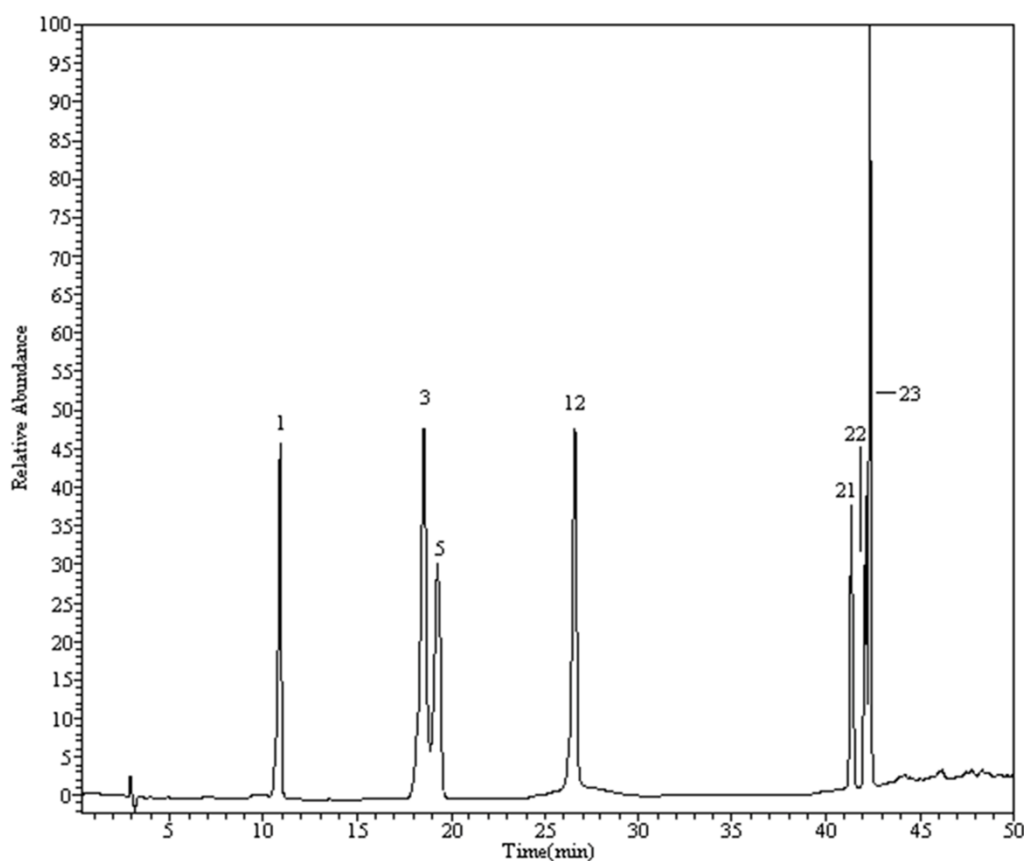

**Figure S1.** The HPLC chromatogram of seven standards

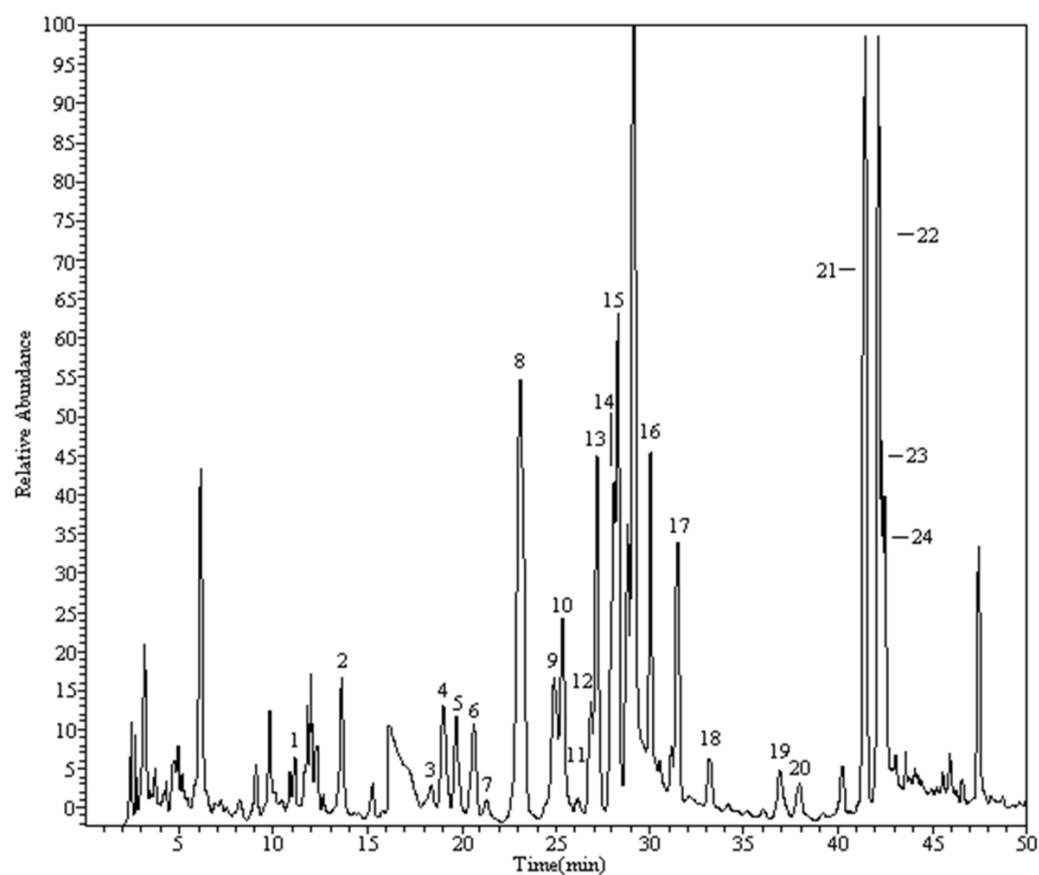

**Figure S2.** HPLC-DAD chromatogram of simultaneous separation of Duhuo extracts

**Table S2.** HPLC-DAD-ESI-MS<sup>n</sup> data and identification of 24 coumarin constituents in

Duhuo extracts

| Peak | $t_R$ (min) | (+)ESI-MS<br>(m/z)                                              | HPLC-ESI(+)-MS <sup>n</sup> experiment<br>m/z(% base peak)                                                                                                                                                                                                                                                                                                         | HPLC-DAD<br>$\lambda_{max}$ (nm) | Identification                        |
|------|-------------|-----------------------------------------------------------------|--------------------------------------------------------------------------------------------------------------------------------------------------------------------------------------------------------------------------------------------------------------------------------------------------------------------------------------------------------------------|----------------------------------|---------------------------------------|
| 1    | 11.21       | 163 [M+H] <sup>+</sup><br>180 [M+NH <sub>4</sub> ] <sup>+</sup> | MS <sup>2</sup> [163]:119(100),91(85)<br>MS <sup>3</sup> [119]:91(100)<br>MS <sup>2</sup> [409]:247 (100)                                                                                                                                                                                                                                                          | 204,218,<br>327                  | Umbelliferone                         |
| 2    | 13.67       | 409[M+H] <sup>+</sup>                                           | MS <sup>3</sup> [247]:229(93),201(30),187(38),175(100)<br>MS <sup>4</sup> [175]:147(100),119(36)                                                                                                                                                                                                                                                                   | 253,262,<br>331                  | $\beta$ -D-glucosyl-<br>columbianetin |
| 3    | 19.01       | 187[M+H] <sup>+</sup>                                           | MS <sup>2</sup> [187]:143(100)<br>MS <sup>3</sup> [143]:115(100)<br>MS <sup>2</sup> [247]:229(100),175(95)<br>MS <sup>3</sup> [175]:147(100)                                                                                                                                                                                                                       | 210,247,<br>301,330              | Psoralen                              |
| 4    | 19.21       | 247[M+H] <sup>+</sup>                                           | MS <sup>4</sup> [147]:119(100),103(86)<br>MS <sup>3</sup> [229]:187(100),175(40)<br>MS <sup>4</sup> [201]:173(100),159(10)<br>MS <sup>2</sup> [217]:202(100),189(23),185 (40)                                                                                                                                                                                      | 202,253,<br>261,331              | Columbianetin                         |
| 5    | 19.78       | 217[M+H] <sup>+</sup>                                           | MS <sup>3</sup> [202]:174(100)<br>MS <sup>4</sup> [174]:146 (100),117(38)<br>MS <sup>2</sup> [377]:345(21),301(58),277(17),205(100)<br>MS <sup>3</sup> [205]:175(100) MS <sup>4</sup> [175]:147(100)                                                                                                                                                               | 203,220,<br>250,304              | Xanthotoxin                           |
| 6    | 20.72       | 377[M+H] <sup>+</sup><br>359[M+H-H <sub>2</sub> O] <sup>+</sup> | MS <sup>2</sup> [359]:301(100),219(40)<br>MS <sup>3</sup> [301]:219(100)<br>MS <sup>4</sup> [219]:219(100),191(35)<br>MS <sup>2</sup> [305]:203(100)MS <sup>3</sup> [203]:175(51),<br>159(100),131(60)<br>MS <sup>4</sup> [159]:131(100)<br>MS <sup>2</sup> [377]:345(7),301(22),277(28),205(100)<br>MS <sup>3</sup> [205]:175(100) MS <sup>4</sup> [175]:147(100) | 205,224,<br>332                  | Angelol A                             |
| 7    | 21.38       | 305[M+H] <sup>+</sup>                                           | MS <sup>2</sup> [359]:301(100),219(43)<br>MS <sup>3</sup> [301]:219(100)<br>MS <sup>4</sup> [219]:219(100),191(50)<br>MS <sup>2</sup> [379]:347(5),303(15),277(36),205(67)<br>MS <sup>3</sup> [205]:175(100) MS <sup>4</sup> [175]:147(100)                                                                                                                        | 202,249,<br>319                  | Oxypeucedanin<br>hydrate              |
| 8    | 23.21       | 377[M+H] <sup>+</sup><br>359[M+H-H <sub>2</sub> O] <sup>+</sup> | MS <sup>2</sup> [361]:303(100),219(18)<br>MS <sup>3</sup> [303]:219(100)<br>MS <sup>4</sup> [219]:219(100),191(55)<br>MS <sup>2</sup> [379]:347(8),303(23),277(13),205(70)<br>MS <sup>3</sup> [205]:175(100) MS <sup>4</sup> [175]:147(100)                                                                                                                        | 207,223,<br>332                  | Isoangelol                            |
| 9    | 25.02       | 379[M+H] <sup>+</sup><br>361[M+H-H <sub>2</sub> O] <sup>+</sup> | MS <sup>2</sup> [361]:303(100),219(18)<br>MS <sup>3</sup> [303]:219(100)<br>MS <sup>4</sup> [219]:219(100),191(55)<br>MS <sup>2</sup> [379]:347(8),303(23),277(13),205(70)<br>MS <sup>3</sup> [205]:175(100) MS <sup>4</sup> [175]:147(100)                                                                                                                        | 204,223,<br>332                  | Anpubesol                             |
| 10   | 25.44       | 379[M+H] <sup>+</sup><br>361[M+H-H <sub>2</sub> O] <sup>+</sup> | MS <sup>2</sup> [361]:303(100),219(20)<br>MS <sup>3</sup> [303]:219(100)<br>MS <sup>4</sup> [219]:219(100),191(45)<br>MS <sup>2</sup> [247]:232(100) MS <sup>3</sup> [232]:217(100)<br>MS <sup>4</sup> [217]:189(100),161(15)                                                                                                                                      | 203,223,<br>331                  | Angelol C                             |
| 11   | 25.81       | 247[M+H] <sup>+</sup>                                           | MS <sup>2</sup> [217]:202(100) MS <sup>3</sup> [202]:174(100)                                                                                                                                                                                                                                                                                                      | 201,288,<br>327                  | Isopimpinellin                        |
| 12   | 26.95       | 217[M+H] <sup>+</sup>                                           |                                                                                                                                                                                                                                                                                                                                                                    | 201,223,                         | Bergapten                             |

|    |       |                                                 |                                                                                                                                                                                                                 |                     |                             |
|----|-------|-------------------------------------------------|-----------------------------------------------------------------------------------------------------------------------------------------------------------------------------------------------------------------|---------------------|-----------------------------|
|    |       |                                                 | MS <sup>4</sup> [174]:146(100)                                                                                                                                                                                  | 270,320             |                             |
| 13 | 27.29 | 359[M+H] <sup>+</sup>                           | MS <sup>2</sup> [359]:301(100),219(42)<br>MS <sup>3</sup> [301]:273(30),219(100)<br>MS <sup>4</sup> [219]:219(100),191(30)                                                                                      | 225,330             | Angelol<br>Adehydration     |
| 14 | 28.14 | 361[M+H] <sup>+</sup>                           | MS <sup>2</sup> [361]:303(100),219(21)<br>MS <sup>3</sup> [303]:219(100)<br>MS <sup>4</sup> [219]:219(100),191(52)                                                                                              | 210,224,<br>257,329 | Anpubesol<br>dehydration    |
| 15 | 28.35 | 361[M+H] <sup>+</sup>                           | MS <sup>2</sup> [361]:303(100),219(23)<br>MS <sup>3</sup> [303]:219(100)<br>MS <sup>4</sup> [219]:219(100),191(50)                                                                                              | 209,225,<br>329     | Angelol<br>Cdehydration     |
| 16 | 30.09 | 289[M+H] <sup>+</sup><br>311[M+Na] <sup>+</sup> | MS <sup>2</sup> [289]:229(100)MS <sup>3</sup> [229]:187(100),<br>175(18)<br>MS <sup>4</sup> [187]:159(100),143(27),131(40)<br>MS <sup>2</sup> [231]:175 (88),149(80),135(100)<br>MS <sup>3</sup> [175]:147(100) | 253,262,<br>330     | Columbianetin<br>acetate    |
| 17 | 31.56 | 231[M+H] <sup>+</sup>                           | MS <sup>3</sup> [149]:131(100),121(63)<br>MS <sup>3</sup> [135]:107(100)<br>MS <sup>4</sup> [147]:119(84),103(100)<br>MS <sup>2</sup> [229]:187(100),175(55)                                                    | 201,249             | Osthenol                    |
| 18 | 33.25 | 229[M+H] <sup>+</sup>                           | MS <sup>3</sup> [187]:159(100),143(55)<br>MS <sup>4</sup> [159]:131(100)<br>MS <sup>2</sup> [303]:229(100)                                                                                                      | 202,331             | Angenomalin                 |
| 19 | 36.98 | 303[M+H] <sup>+</sup><br>325[M+Na] <sup>+</sup> | MS <sup>3</sup> [229]:187(100),175(28)<br>MS <sup>4</sup> [187]:159(100),143(57)<br>MS <sup>2</sup> [359]:301(100),259(18),219(45)                                                                              | 202,331             | Columbianetin<br>propionate |
| 20 | 37.89 | 359[M+H] <sup>+</sup>                           | MS <sup>3</sup> [301]:273,(20),219(100)<br>MS <sup>4</sup> [219]:219(100),191(45)<br>MS <sup>2</sup> [245]:189(100)                                                                                             | 225,330             | Isoangelol<br>dehydration   |
| 21 | 41.45 | 245[M+H] <sup>+</sup>                           | MS <sup>3</sup> [189]:161(100),159(76)<br>MS <sup>4</sup> [161]:133(100)<br>MS <sup>2</sup> [329]:229(100)                                                                                                      | 207,252,<br>259,326 | Osthole                     |
| 22 | 42.20 | 329[M+H] <sup>+</sup><br>351[M+Na] <sup>+</sup> | MS <sup>3</sup> [229]:201(43),187(100),175(34)<br>MS <sup>4</sup> [187]:159(100),143(42),131(35)<br>MS <sup>2</sup> [271]:203(100)                                                                              | 206,263,<br>330     | Columbianadin               |
| 23 | 42.48 | 271[M+H] <sup>+</sup>                           | MS <sup>3</sup> [203]:175(42),159(100)<br>MS <sup>4</sup> [159]:131(100)<br>MS <sup>2</sup> [331]:229(100)                                                                                                      | 205,252,<br>261,313 | Isoimperatorin              |
| 24 | 42.61 | 331[M+H] <sup>+</sup><br>353[M+Na] <sup>+</sup> | MS <sup>3</sup> [229]:201(35),187(100),175(10)<br>MS <sup>4</sup> [187]:159(100),143(35),131(32)                                                                                                                | 204,252,<br>262,330 | Dihydrocolumbi<br>anadin    |

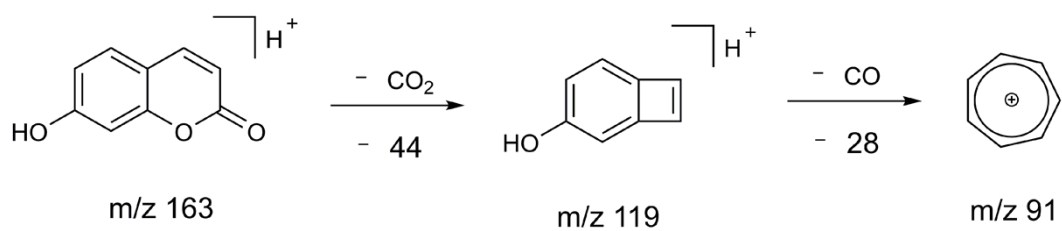

**Scheme S1.** Proposed MS fragmentation pathway for the  $[M+H]^+$  ion of Peak 1

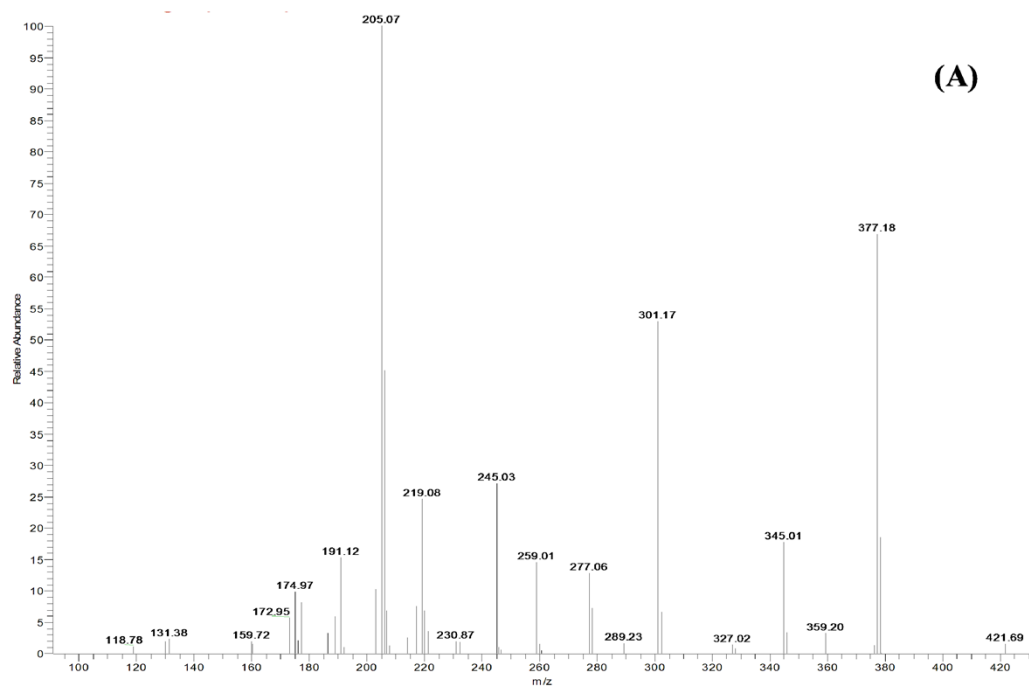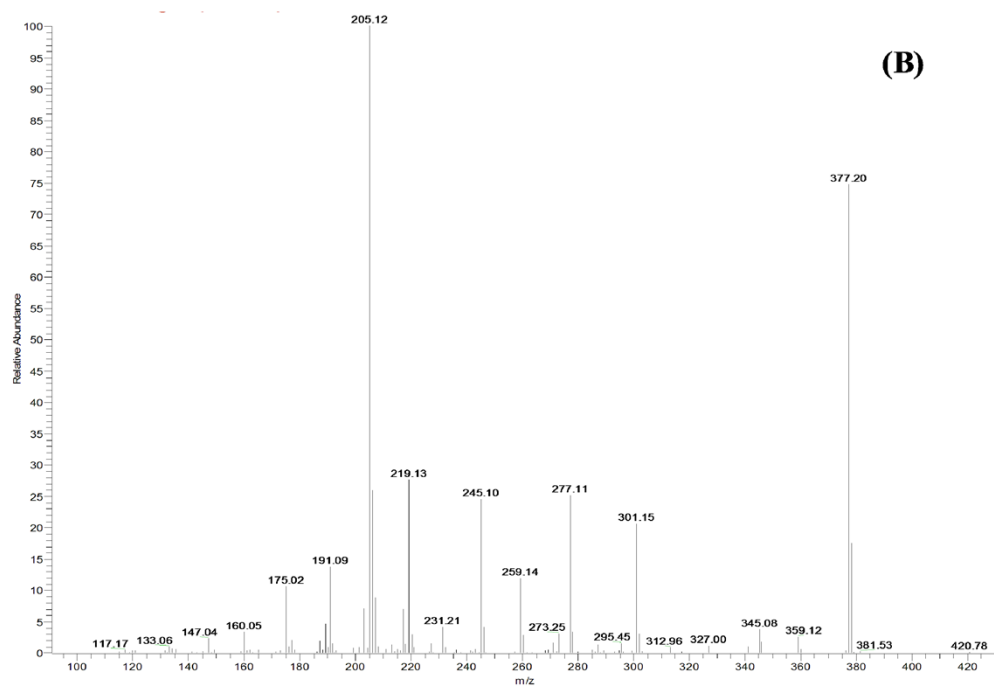

**Figure S3.** MS<sup>2</sup> spectrum of the ion at  $m/z$  377 for Peak 6 (A) and Peak 8 (B)

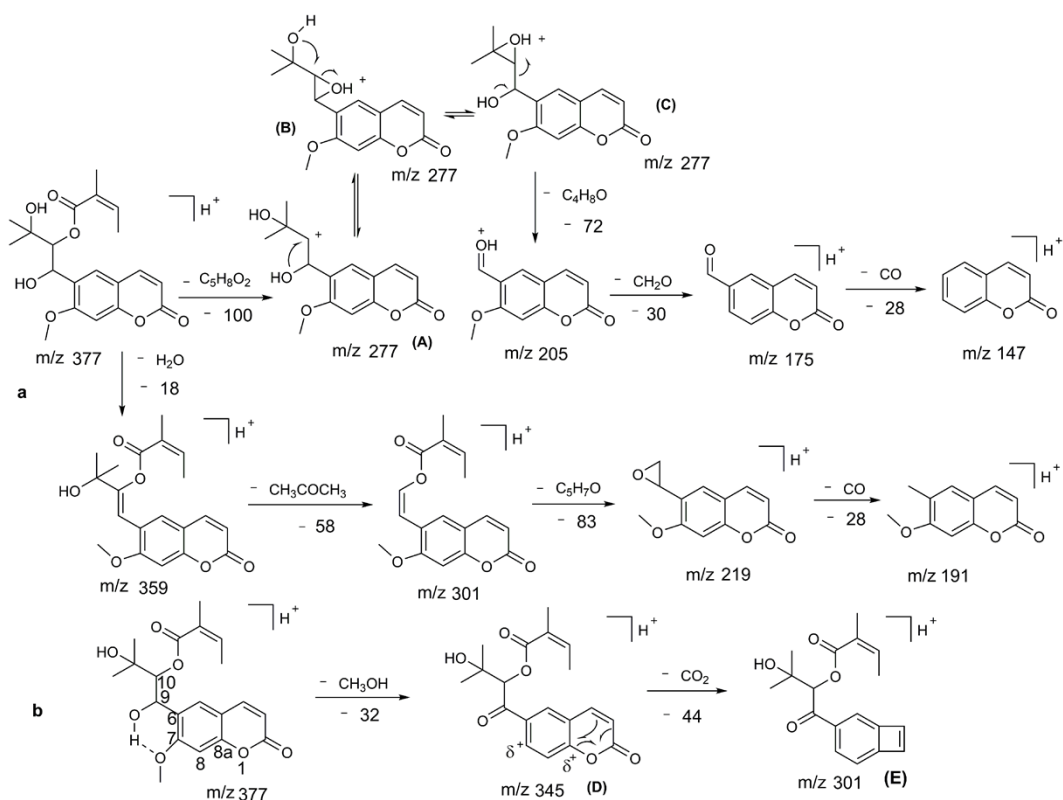

**Scheme S2.** Proposed MS fragmentation pathway for the  $[M+H]^+$  ion of Peak 6

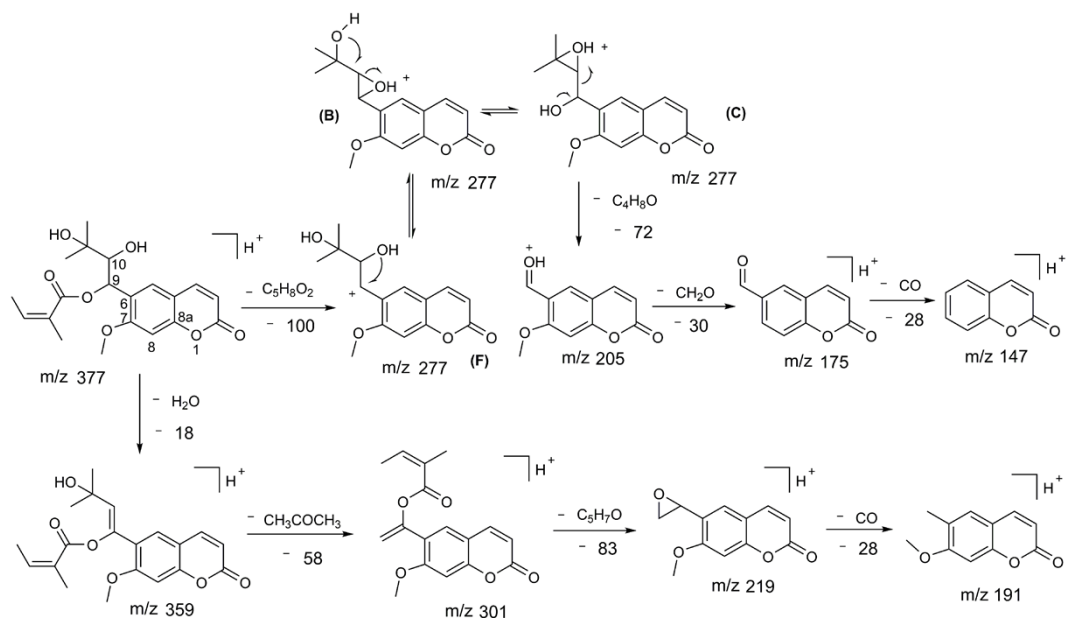

**Scheme S3.** Proposed MS fragmentation pathway for the  $[M+H]^+$  ion of Peak 8



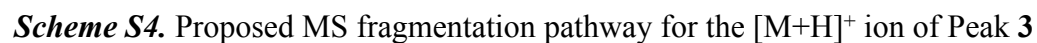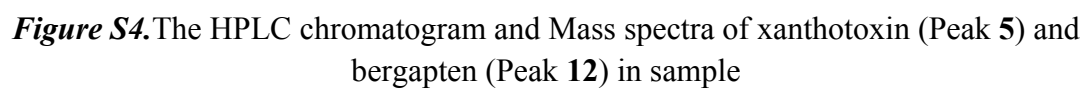

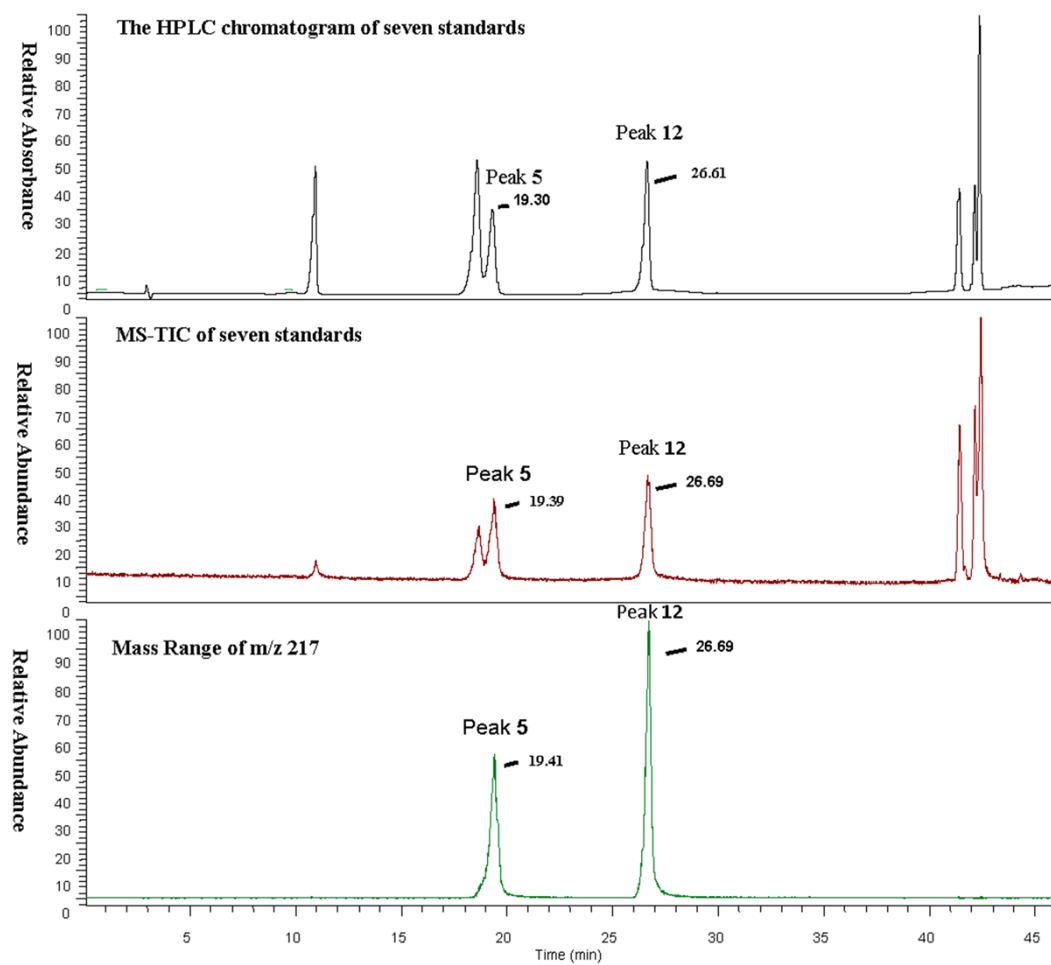

**Figure S5.** The HPLC chromatogram and Mass spectra of xanthotoxin (Peak 5) and bergapten (Peak 12) in standards

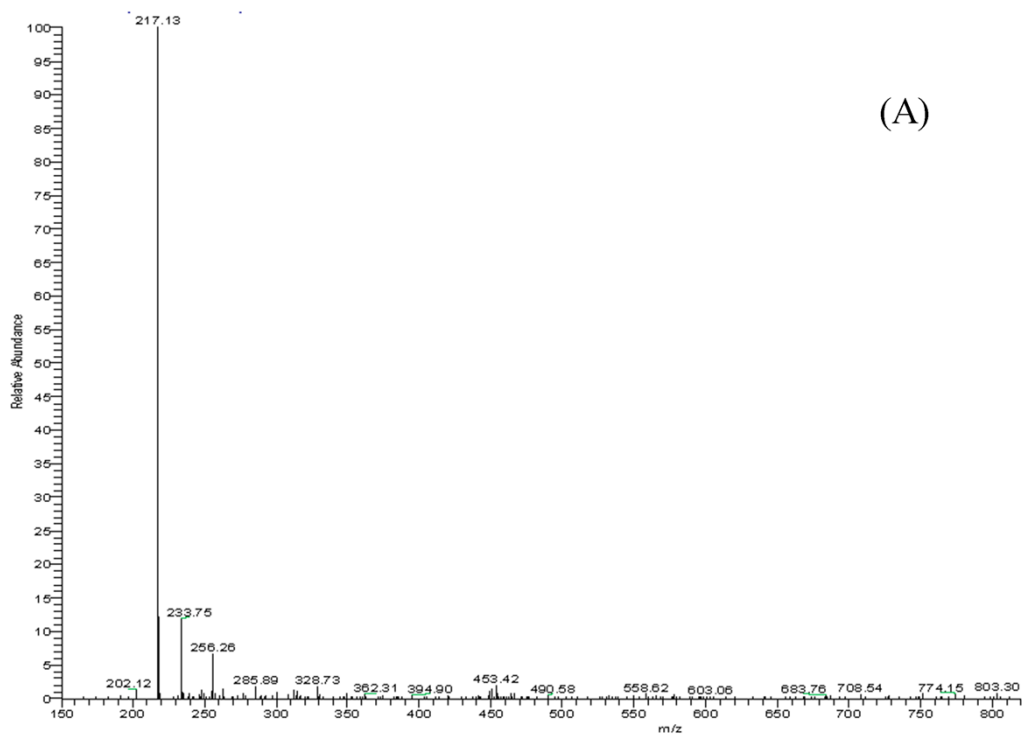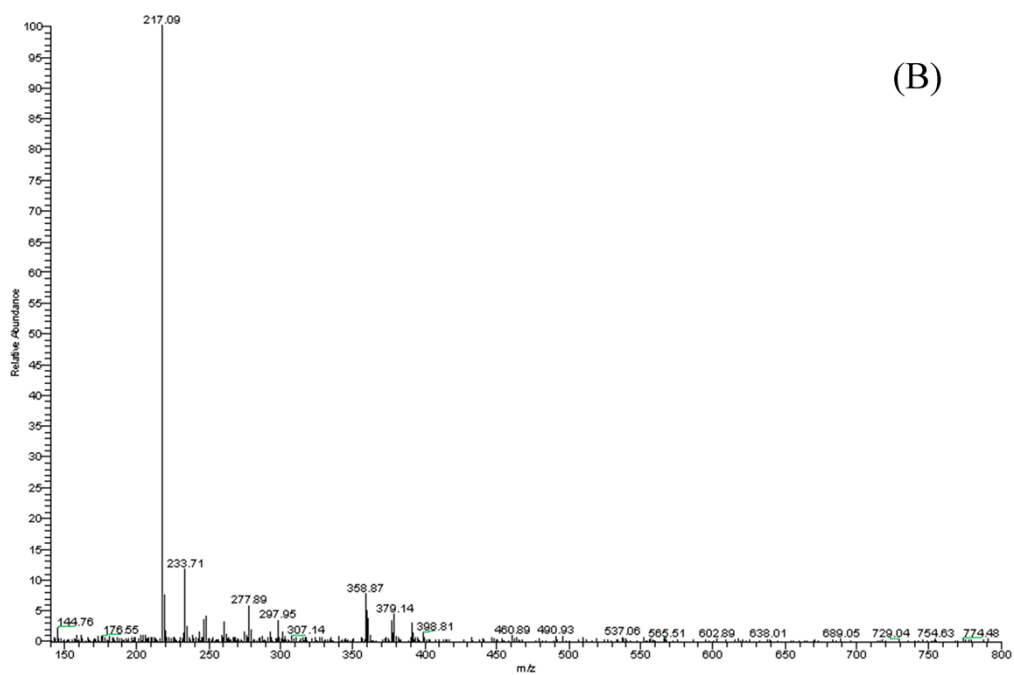

**Figure S6.** MS spectrum of the ion at  $m/z$  217 for Peak 5(A) and Peak 12(B).

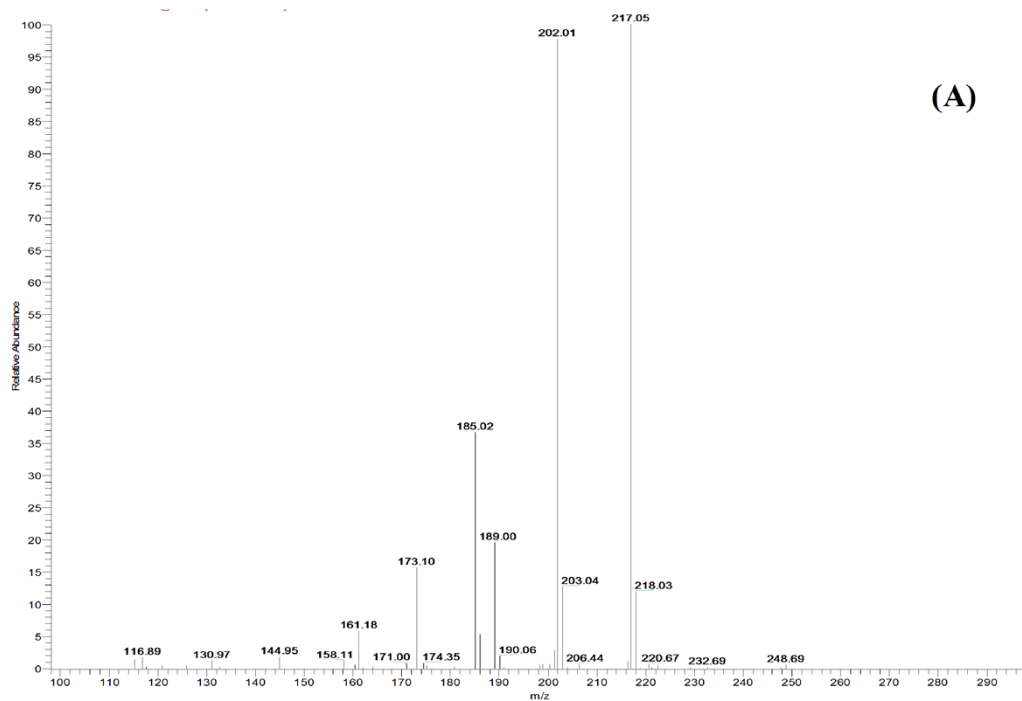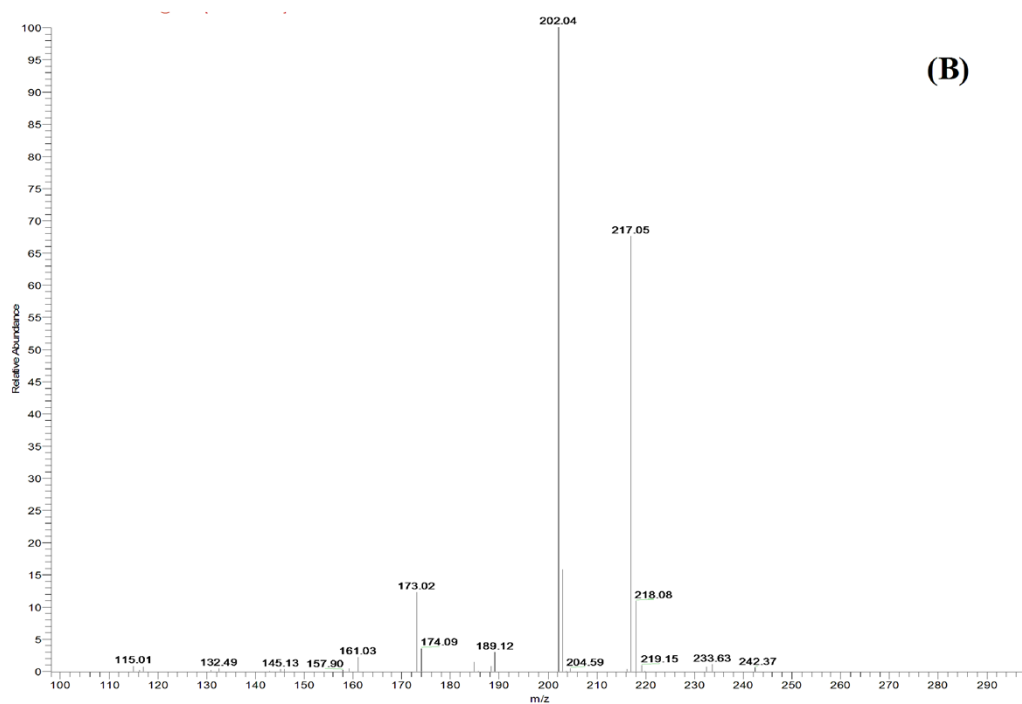

**Figure S7.** MS<sup>2</sup> spectrum of the ion at m/z 217 for Peak 5(A) and Peak 12(B).

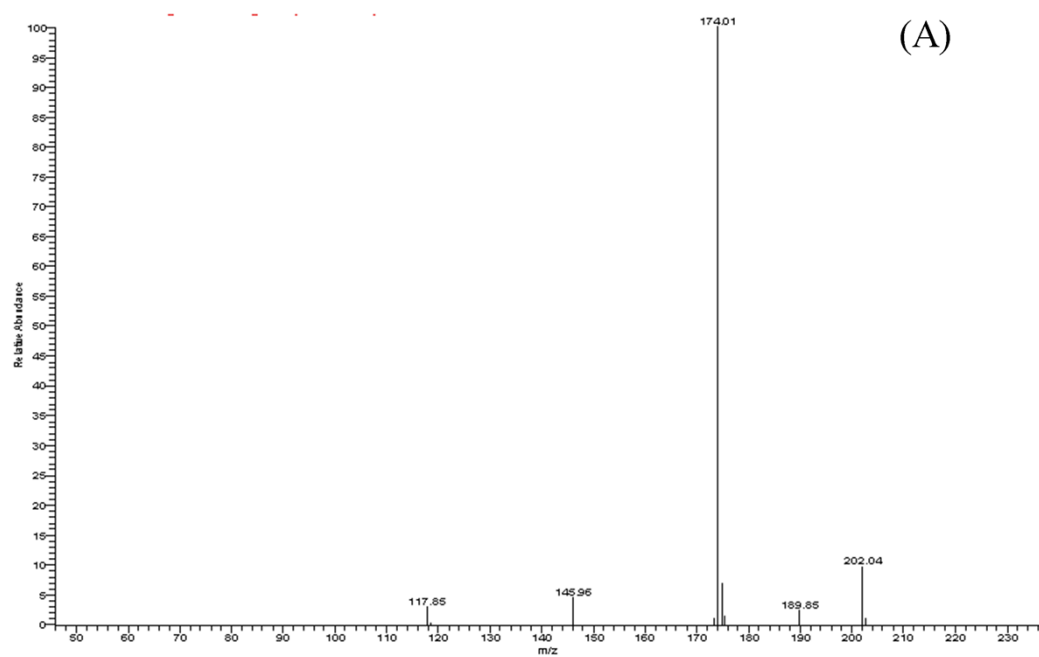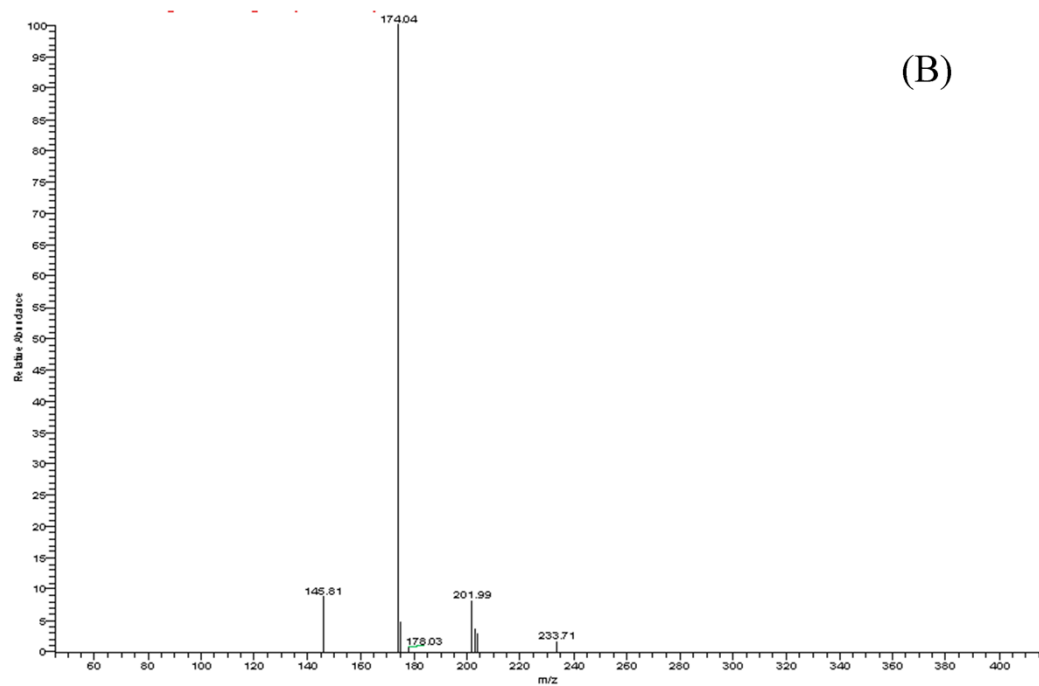

**Figure S8.** MS<sup>3</sup> spectrum of the ion at m/z 217 for Peak 5(A) and Peak 12(B).

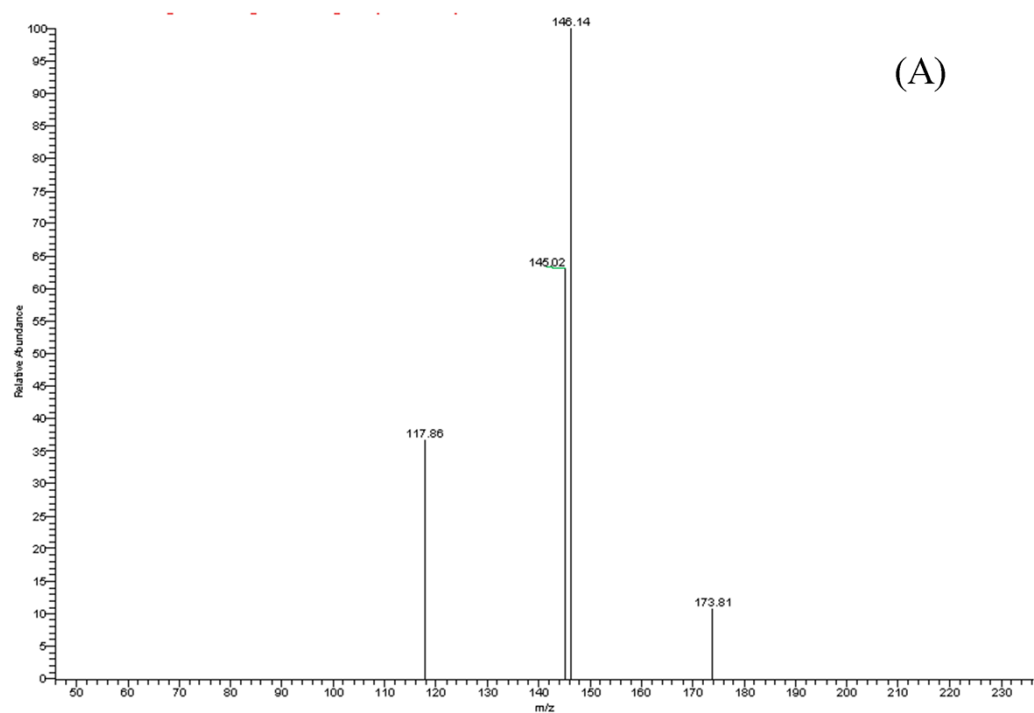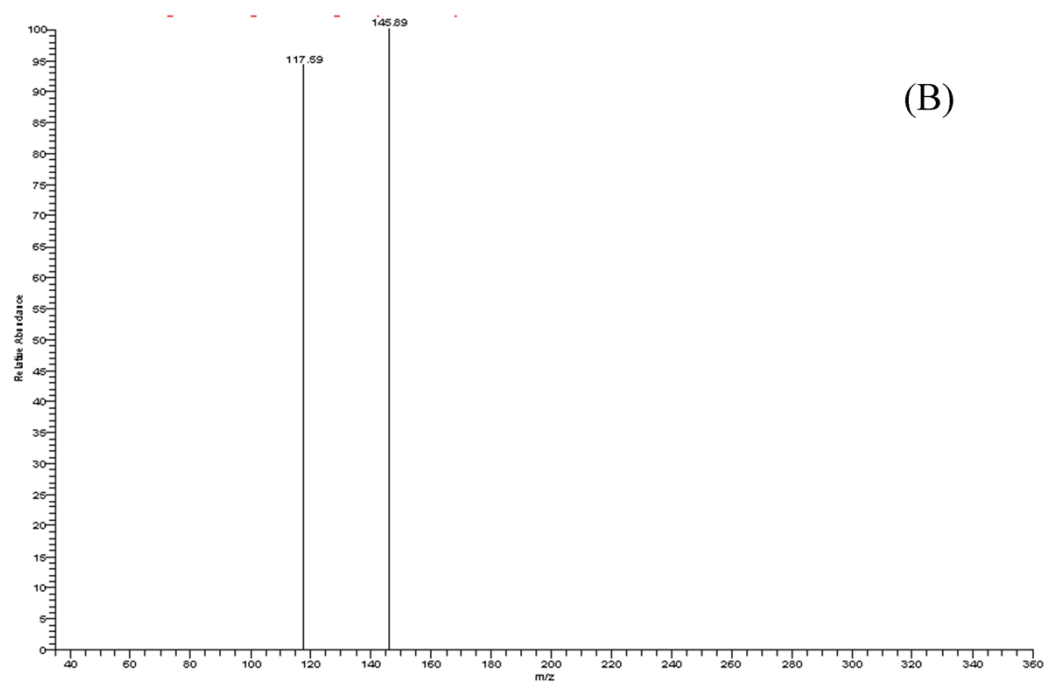

**Figure S9.** MS<sup>4</sup> spectrum of the ion at m/z 217 for Peak 5(A) and Peak 12(B).

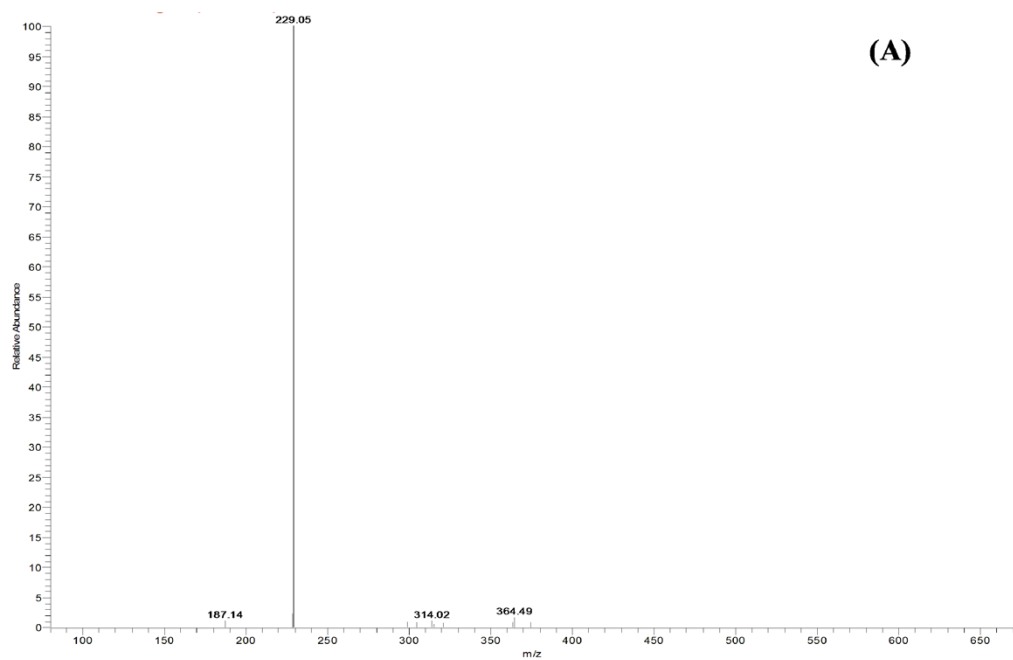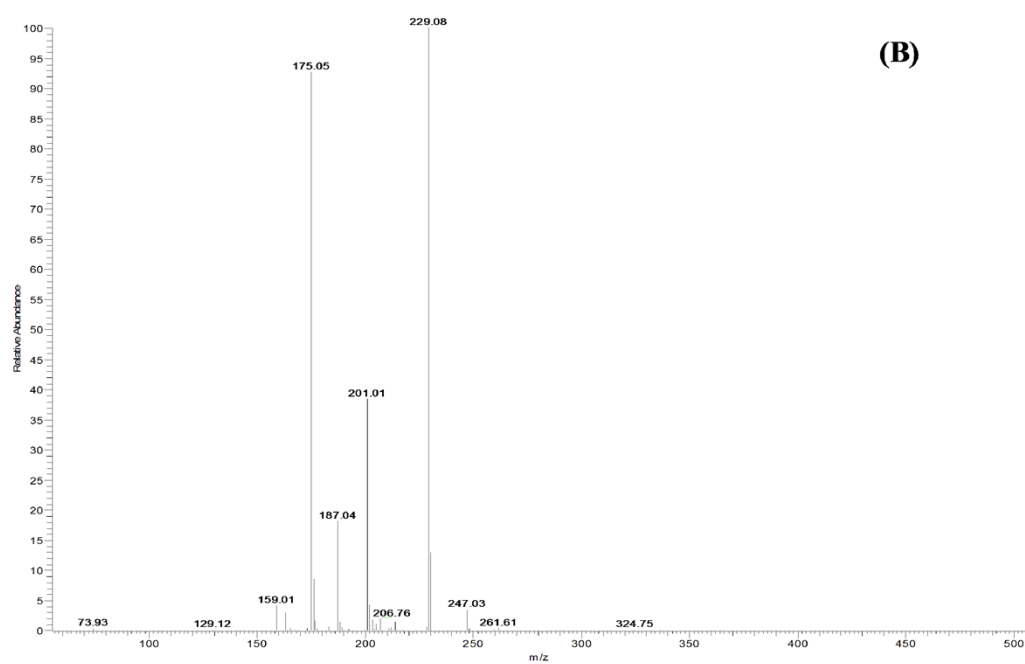

**Figure S10.** MS<sup>2</sup> spectrum of the ion at m/z 329 for Peak **23** (A) and the ion at m/z 247 for Peak **4** (B)

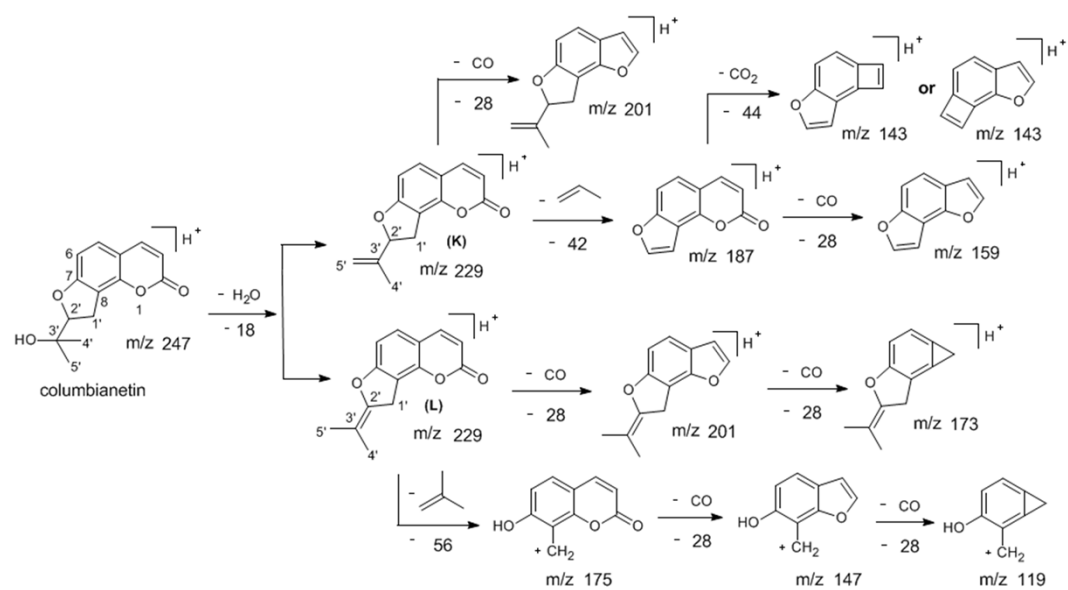

**Scheme S5.** Proposed MS fragmentation pathway for the  $[M+H]^+$  ion of Peak 4
